# Supplementary material for: Characterizing the spatiotemporal variability of groundwater levels of alluvial aquifers in different settings using drought indices
Source: Copernicus journal article supplement (doi:10.5194/hess-21-2421-2017), 2017-05-09
Supplement: Supplementary file [file hess-21-2421-2017-supplement-title-page.pdf › hess-21-2421-2017-supplement-title-page.pdf]

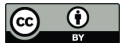

## *Supplement of*

# **Characterizing the spatiotemporal variability of groundwater levels of alluvial aquifers in different settings using drought indices**

**Johannes Christoph Haas and Steffen Birk**

*Correspondence to:* Johannes Christoph Haas ([johannes.haas@uni-graz.at](mailto:johannes.haas@uni-graz.at))

- [hess-21-2421-2017-supplement-title-page.pdf](#)
- [JC\\_Haas\\_hess-2016-402\\_Supplement.ods](#)

The copyright of individual parts of the supplement might differ from the CC-BY 3.0 licence.
